# Supplementary material for: A Pilot Study to Develop a Diagnostic Test for Pancreatic Ductal Adenocarcinoma Based on Differential Expression of Select miRNA in Plasma and Bile
Source: PubMed Central journal article supplement — Am J Gastroenterol. 2014 Oct 28;109(12):1942–52. doi: 10.1038/ajg.2014.331 (PMC4261139; doi:10.1038/ajg.2014.331), 2014-10-28
Supplement: ajg2014331x1.pdf [file ajg2014331x1.pdf]

**Supplementary table 1. Relative expression of miRNA in plasma and bile among individuals with PDAC, CP, and controls**

| Candidate miRNA                 | PDAC            | CP          | Normal      | P value | PDAC vs. CP | PDAC vs. Normal | CP vs. Normal |
|---------------------------------|-----------------|-------------|-------------|---------|-------------|-----------------|---------------|
| <b>Training Cohort - Plasma</b> |                 |             |             |         |             |                 |               |
|                                 | <b>N=40</b>     | <b>N=30</b> | <b>N=24</b> |         |             |                 |               |
| miR-10b                         | 13.1 (13.2)     | 0.9 (1.2)   | 1.1 (0.6)   | <0.001  | <0.001      | <0.001          | 1.000         |
|                                 | 21.2 (30.8)     | 1.2 (0.8)   | 1.0 (0.4)   |         |             |                 |               |
| miR-21                          | 0.9 (0.7)       | 1.2 (1.7)   | 0.8 (0.7)   | 0.426   |             |                 |               |
|                                 | 1.0 (0.8)       | 1.5 (1.4)   | 1.0 (0.6)   |         |             |                 |               |
| miR-30c                         | 8.4 (11.8)      | 1.3 (3.0)   | 0.8 (0.8)   | <0.001  | <0.001      | <0.001          | 0.126         |
|                                 | 14.5 (18.8)     | 2.2 (2.1)   | 1.0 (0.7)   |         |             |                 |               |
| miR-106b                        | 8.4 (13.6)      | 1.4 (1.2)   | 0.9 (0.9)   | <0.001  | <0.001      | <0.001          | 0.378         |
|                                 | 14.2 (12.3)     | 1.4 (0.9)   | 1.0 (0.6)   |         |             |                 |               |
| miR-132                         | 1.9 (2.8)       | 1.0 (1.2)   | 0.7 (0.7)   | 0.001   | 0.073       | 0.001           | 0.341         |
|                                 | 2.4 (1.8)       | 1.5 (1.4)   | 1.0 (0.9)   |         |             |                 |               |
| miR-155                         | 164.1 (826.8)   | 1.1 (2.1)   | 1.1 (0.8)   | <0.001  | <0.001      | <0.001          | 0.558         |
|                                 | 1051.1 (2080.2) | 2.4 (2.9)   | 1.0 (0.6)   |         |             |                 |               |
| miR-181a                        | 2.0 (2.4)       | 1.0 (1.3)   | 1.0 (0.7)   | 0.007   | 0.016       | 0.025           | 1.000         |
|                                 | 2.6 (3.5)       | 1.1 (0.9)   | 1.0 (0.5)   |         |             |                 |               |
| miR-181b                        | 1.8 (1.9)       | 0.5 (0.5)   | 0.9 (0.6)   | <0.001  | <0.001      | 0.001           | 0.096         |
|                                 | 2.2 (1.5)       | 0.7 (0.7)   | 1.0 (0.6)   |         |             |                 |               |
| miR-196a                        | 2.0 (3.1)       | 0.6 (0.9)   | 0.8 (1.2)   | <0.001  | <0.001      | <0.001          | 1.000         |
|                                 | 2.8 (2.5)       | 1.2 (1.7)   | 1.0 (0.9)   |         |             |                 |               |
| miR-212                         | 7.3 (6.7)       | 1.0 (1.5)   | 0.8 (0.9)   | <0.001  | <0.001      | <0.001          | 0.578         |
|                                 | 7.3 (5.0)       | 1.7 (1.9)   | 1.0 (0.9)   |         |             |                 |               |
| <b>Training cohort - bile</b>   |                 |             |             |         |             |                 |               |
|                                 | <b>N=25</b>     | <b>N=23</b> | <b>N=22</b> |         |             |                 |               |
| miR-10b                         | 10.2 (8.6)      | 0.7 (1.0)   | 1.0 (0.5)   | <0.001  | <0.001      | <0.001          | 1.000         |
|                                 | 19.5 (27.0)     | 1.1 (0.7)   | 1.0 (0.4)   |         |             |                 |               |
| miR-21                          | 1.4 (1.4)       | 1.3 (1.3)   | 1.0 (0.6)   | 0.151   |             |                 |               |
|                                 | 1.5 (1.0)       | 1.5 (1.1)   | 1.0 (0.4)   |         |             |                 |               |
| miR-30c                         | 11.3 (8.5)      | 1.5 (1.2)   | 1.0 (0.6)   | <0.001  | <0.001      | <0.001          | 0.051         |
|                                 | 13.7 (9.4)      | 1.6 (1.1)   | 1.0 (0.5)   |         |             |                 |               |
| miR-106b                        | 19.9 (19.7)     | 1.2 (1.3)   | 1.1 (0.4)   | <0.001  | <0.001      | <0.001          | 0.622         |
|                                 | 25.0 (19.9)     | 1.5 (1.1)   | 1.1 (0.6)   |         |             |                 |               |
| miR-132                         | 1.2 (1.6)       | 1.0 (1.1)   | 1.1 (0.7)   | 0.535   |             |                 |               |
|                                 | 1.5 (1.1)       | 1.1 (1.0)   | 1.2 (1.2)   |         |             |                 |               |
| miR-155                         | 24.7 (20.2)     | 1.1 (1.2)   | 0.9 (0.4)   | <0.001  | <0.001      | <0.001          | 0.761         |
|                                 | 31.5 (26.8)     | 1.2 (0.8)   | 1.0 (0.4)   |         |             |                 |               |
| miR-181a                        | 1.5 (1.1)       | 1.2 (1.1)   | 1.0 (0.4)   | 0.016   | 0.115       | 0.015           | 1.000         |

|                            | 1.8 (1.3)         | 1.2 (0.8) | 1.0 (0.4) |        |        |        |        |
|----------------------------|-------------------|-----------|-----------|--------|--------|--------|--------|
| miR-181b                   | 1.1 (1.0)         | 1.3 (1.1) | 1.0 (0.8) | 0.297  |        |        |        |
|                            | 1.5 (1.1)         | 1.5 (1.0) | 1.1 (0.7) |        |        |        |        |
| miR-196a                   | 1.6 (1.0)         | 1.2 (0.9) | 0.9 (0.8) | 0.009  | 0.198  | 0.006  | 0.527  |
|                            | 1.9 (1.3)         | 1.3 (0.9) | 1.0 (0.5) |        |        |        |        |
| miR-212                    | 10.7 (8.5)        | 1.0 (0.9) | 0.8 (0.7) | <0.001 | <0.001 | <0.001 | 1.000  |
|                            | 12.2 (6.6)        | 1.2 (0.8) | 1.1 (0.5) |        |        |        |        |
|                            |                   |           |           |        |        |        |        |
| Validation Cohort - Plasma |                   |           |           |        |        |        |        |
|                            | N=29              | N=37      | N=38      |        |        |        |        |
| miR-10b                    | 31.5 (58.5)       | 1.0 (1.0) | 1.0 (0.7) | <0.001 | <0.001 | <0.001 | 1.000  |
|                            | 70.4 (93.4)       | 1.2 (0.7) | 1.0 (0.6) |        |        |        |        |
| miR-30c                    | 11.6 (12.7)       | 1.3 (1.2) | 0.9 (1.1) | <0.001 | <0.001 | <0.001 | 0.942  |
|                            | 13.1 (10.0)       | 1.4 (0.8) | 1.3 (1.0) |        |        |        |        |
| miR-106b                   | 19.4 (12.8)       | 1.1 (1.4) | 0.7 (1.0) | <0.001 | <0.001 | <0.001 | 0.851  |
|                            | 22.4 (16.7)       | 1.2 (1.0) | 0.9 (0.7) |        |        |        |        |
| miR-155                    | 80.2 (717.6)      | 1.5 (1.7) | 1.0 (0.5) | <0.001 | <0.001 | <0.001 | <0.001 |
|                            | 841.2<br>(1428.2) | 2.0 (1.6) | 1.1 (0.8) |        |        |        |        |
| miR-212                    | 13.9 (12.4)       | 1.2 (1.1) | 0.8 (0.7) | <0.001 | <0.001 | <0.001 | 0.003  |
|                            | 17.4 (12.7)       | 1.5 (0.8) | 0.9 (0.5) |        |        |        |        |
| Validation cohort - bile   |                   |           |           |        |        |        |        |
|                            | N=28              | N=28      | N=33      |        |        |        |        |
| miR-10b                    | 9.6 (7.1)         | 1.0 (0.7) | 1.0 (0.6) | <0.001 | <0.001 | <0.001 | 1.000  |
|                            | 14.0 (14.8)       | 1.1 (0.7) | 1.0 (0.4) |        |        |        |        |
| miR-30c                    | 7.3 (5.9)         | 1.1 (1.0) | 1.0 (0.5) | <0.001 | <0.001 | <0.001 | 1.000  |
|                            | 10.4 (10.0)       | 1.3 (0.9) | 1.0 (0.4) |        |        |        |        |
| miR-106b                   | 11.3 (12.4)       | 1.2 (1.1) | 1.1 (0.7) | <0.001 | <0.001 | <0.001 | 1.000  |
|                            | 16.0 (16.5)       | 1.3 (0.8) | 1.1 (0.5) |        |        |        |        |
| miR-155                    | 21.0 (25.9)       | 0.9 (1.0) | 0.8 (0.8) | <0.001 | <0.001 | <0.001 | 0.468  |
|                            | 31.6 (28.4)       | 1.2 (0.8) | 1.0 (0.7) |        |        |        |        |
| miR-212                    | 8.1 (6.1)         | 0.9 (0.4) | 1.0 (0.4) | <0.001 | <0.001 | <0.001 | 1.000  |
|                            | 9.4 (5.4)         | 0.9 (0.3) | 0.9 (0.4) |        |        |        |        |

All miRNA levels are nonparametric and hence median (interquartile range) is reported. We also include mean (standard deviation) in gray font for descriptive purposes. P-values are obtained based using the Kruskal-Wallis test and pairwise p-values are adjusted using the Bonferroni multiple comparison approach.

**Supplementary Table 2. Performance characteristics of miRNA for distinguishing PDAC from CP and control subjects (training cohort, n=95)**

| Candidate miRNA | PDAC vs. CP | PDAC vs. Control | CP vs. Control | PDAC vs. Other | Threshold    |
|-----------------|-------------|------------------|----------------|----------------|--------------|
| <b>Plasma</b>   |             |                  |                |                |              |
| miR-10b         | 0.982       | 1.000            | 0.494          | <b>0.980</b>   | <b>3.579</b> |
| miR-21          | 0.589       | 0.485            | 0.572          | 0.556          |              |
| miR-30c         | 0.902       | 0.984            | 0.625          | <b>0.938</b>   | <b>4.873</b> |
| miR-106b        | 0.998       | 1.000            | 0.609          | <b>0.999</b>   | <b>2.92</b>  |
| miR-132         | 0.659       | 0.757            | 0.634          | 0.703          |              |
| miR-155         | 0.971       | 0.979            | 0.601          | <b>0.975</b>   | <b>10.68</b> |
| miR-181a        | 0.687       | 0.698            | 0.495          | 0.692          |              |
| miR-181b        | 0.873       | 0.786            | 0.680          | 0.834          |              |
| miR-196a        | 0.763       | 0.773            | 0.466          | 0.767          |              |
| miR-212         | 0.878       | 0.927            | 0.596          | <b>0.900</b>   | <b>2.013</b> |
| <b>Bile</b>     |             |                  |                |                |              |
| miR-10b         | 0.974       | 0.965            | 0.458          | <b>0.970</b>   | <b>3.497</b> |
| miR-21          | 0.485       | 0.645            | 0.646          | 0.578          |              |
| miR-30c         | 0.991       | 1.000            | 0.678          | <b>0.996</b>   | <b>3.933</b> |
| miR-106b        | 0.983       | 0.991            | 0.597          | <b>0.987</b>   | <b>5.261</b> |
| miR-132         | 0.590       | 0.562            | 0.538          | 0.576          |              |
| miR-155         | 0.986       | 0.995            | 0.586          | <b>0.990</b>   | <b>5.232</b> |
| miR-181a        | 0.671       | 0.733            | 0.569          | 0.701          |              |
| miR-181b        | 0.550       | 0.580            | 0.636          | 0.513          |              |
| miR-196a        | 0.637       | 0.772            | 0.599          | 0.703          |              |
| miR-212         | 0.981       | 0.982            | 0.538          | <b>0.981</b>   | <b>4.163</b> |

AUC = Area under the curve;

Threshold denotes the miRNA expression level corresponding to the AUC for PDAC vs. All other (CP + controls).

For reference, accuracy is graded from fail to excellent based on the following AUC thresholds:

| Accuracy  | AUC    |
|-----------|--------|
| Excellent | ≥ 0.90 |
| Good      | ≥ 0.80 |
| Fair      | ≥ 0.70 |
| Poor      | ≥ 0.60 |
| Fail      | < 0.60 |

**Supplemental Figure 1. Plasma and bile miRNA expression by smoking status**

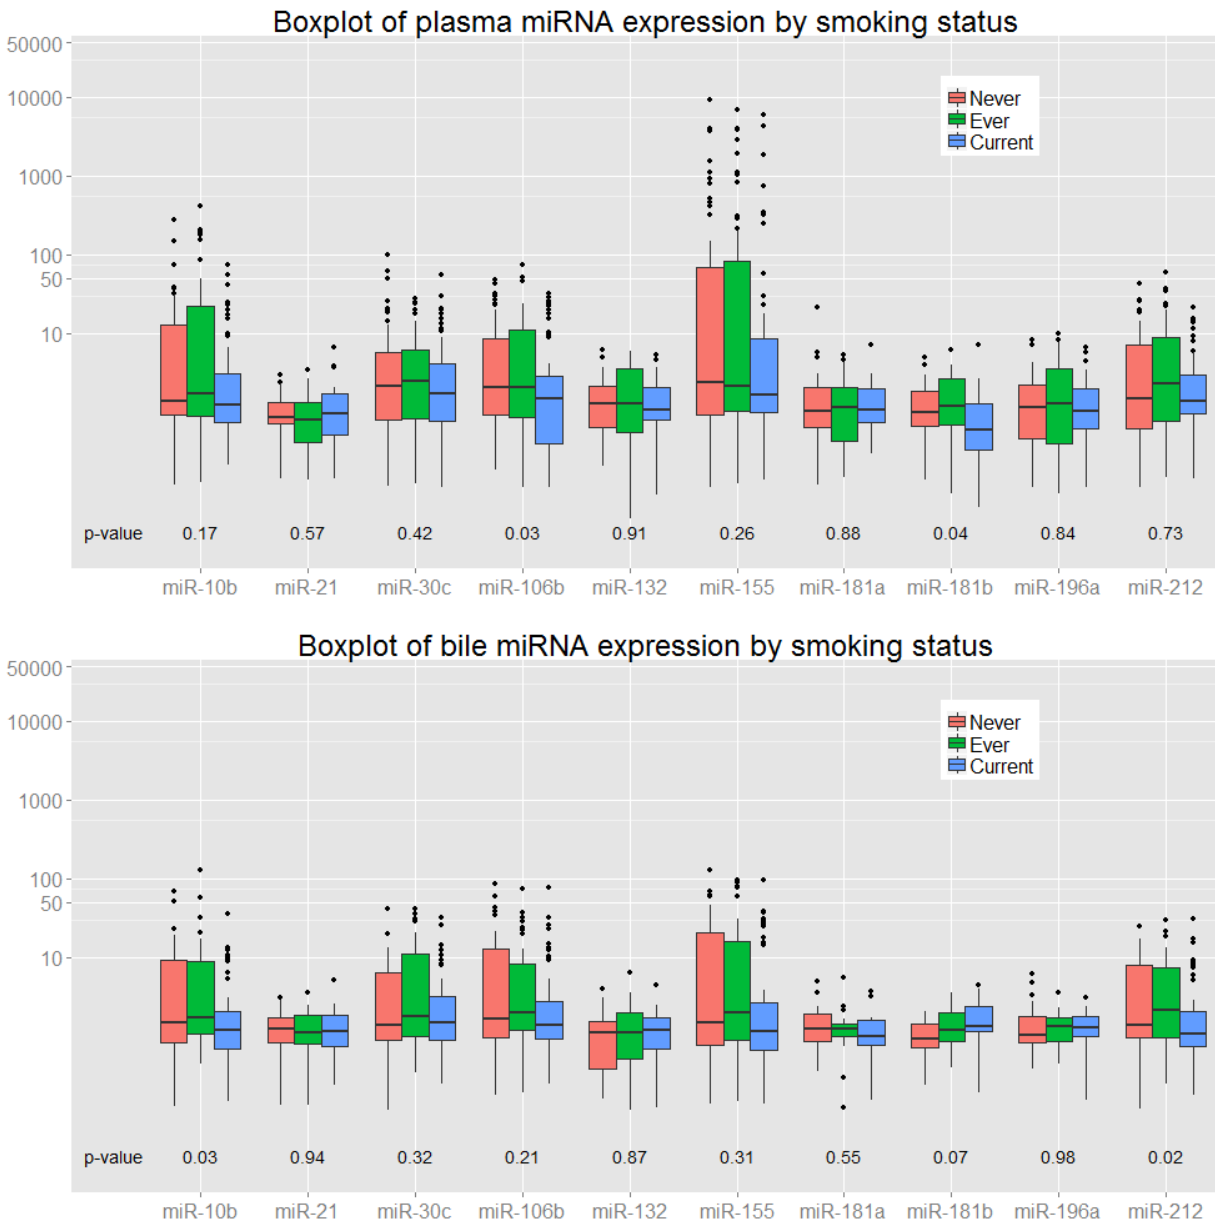

Differential expression of miRNA in plasma (top panel) and bile (bottom panel) is illustrated as a function of smoking status (never, ever, or current). The inclusion of smoking status in our regression models to establish Signature Panels did not impact the results.

**Supplemental Figure 2. Plasma and bile miRNA expression by serum bilirubin elevation**

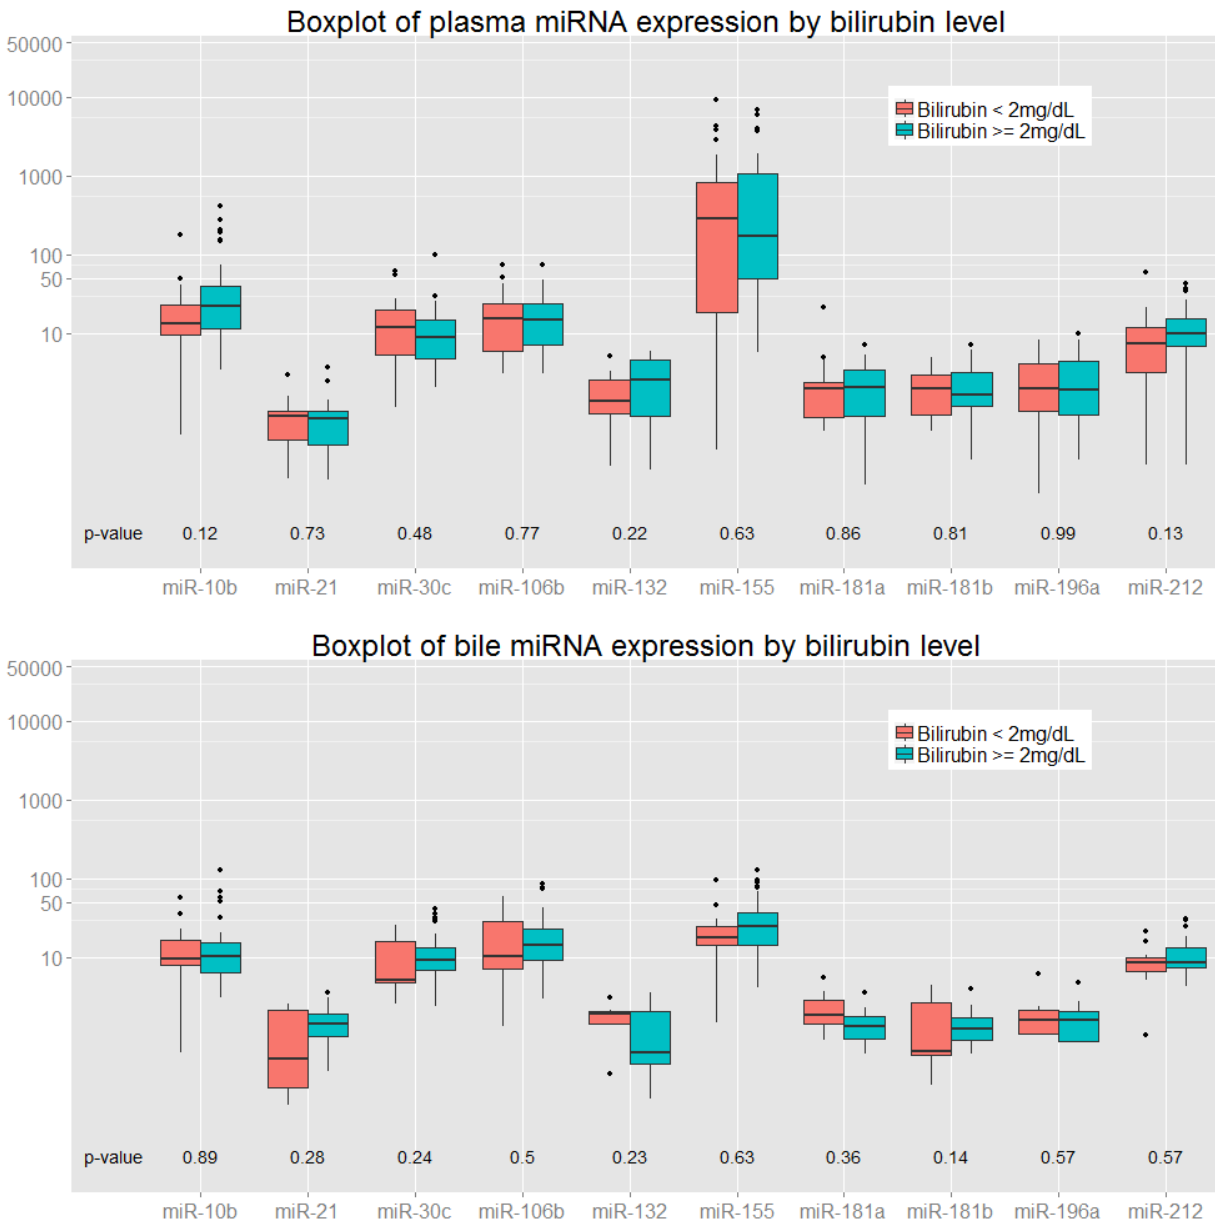

Differential expression of miRNA in plasma (top panel) and bile (bottom panel) is illustrated as a function of serum bilirubin elevation, defined as  $> 2\text{mg/dL}$ . The inclusion of serum bilirubin in our regression models to establish Signature Panels did not impact the results.

**Supplemental Figure 3. Plasma and bile miRNA expression by age**

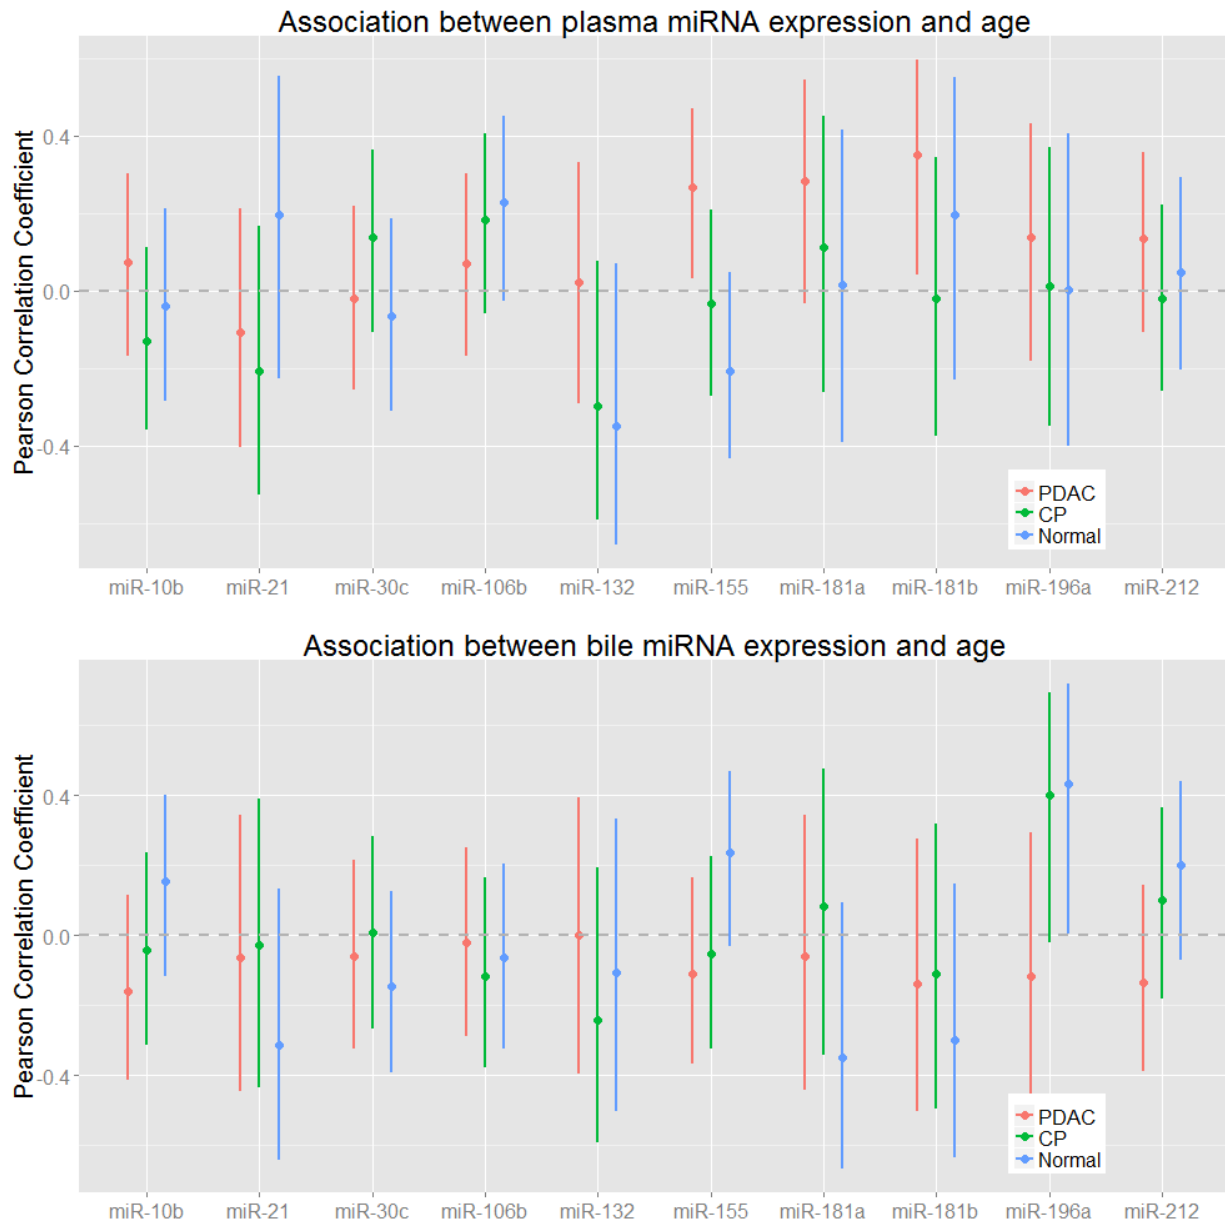

Differential expression of miRNA in plasma (top panel) and bile (bottom panel) is illustrated as a function of age. The inclusion of age in our regression models to establish Signature Panels did not impact the results.
